# Supplementary material for: Patterns and Predictors of First-Line Taxane Use in Patients with Metastatic Triple-Negative Breast Cancer in US Clinical Practice
Source: MDPI journal article supplement (doi:10.3390/curroncol28040239), 2021-07-17
Supplement: s1 [file s1]

## Article

# Patterns and Predictors of First-Line Taxane Use in Patients with Metastatic Triple-Negative Breast Cancer in US Clinical Practice

Joyce O'Shaughnessy <sup>1</sup>, Leisha A. Emens <sup>2</sup>, Stephen Y. Chui <sup>3</sup>, Wei Wang <sup>4,a</sup>, Kenneth Russell <sup>5</sup>, Shih-Wen Lin <sup>3</sup>, Carlos Flores Avile <sup>6</sup>, Patricia Luhn <sup>3,\*</sup> and Andreas Schneeweiss <sup>7</sup>

## SUPPLEMENTARY MATERIALS

### Supplementary Table 1 Included treatments of interest

| Drug Name                          | HCPCS and NDCs Included                                                                   |
|------------------------------------|-------------------------------------------------------------------------------------------|
| <b>Taxanes</b>                     |                                                                                           |
| Paclitaxel (Nov-Onxol, Taxol)      | C9431, J9265                                                                              |
| Docetaxel (Novaplus, Taxotere)     | J9170, J9171                                                                              |
| <i>nab</i> -Paclitaxel (Abraxane)  | C9127, J9264                                                                              |
| <b>Anthracyclines</b>              |                                                                                           |
| Doxorubicin (Doxil)                | C9415, J9000, J9001, Q2050, Q2049, J9002, Q2048                                           |
| Epirubicin                         | J9178                                                                                     |
| <b>Platinum agents</b>             |                                                                                           |
| Carboplatin (Amerinet, Paraplatin) | J9045                                                                                     |
| Cisplatin                          | C9418, J9060, J9062                                                                       |
| <b>Targeted therapies</b>          |                                                                                           |
| Bevacizumab (Avastin)              | C9214, C9257, J9035, Q2024, S0116                                                         |
| Cetuximab                          | C9215, J9055                                                                              |
| <b>Antimetabolites</b>             |                                                                                           |
| Gemcitabine (Gemzar)               | J9201                                                                                     |
| Capecitabine (Xeloda)              | J8520, J8521                                                                              |
| 5-Fluorouracil                     | J9190                                                                                     |
| Methotrexate                       | J8610, J9250, J9260                                                                       |
| <b>Alkylating agents</b>           |                                                                                           |
| Cyclophosphamide                   | C9420, C9421, J8530, J9070, J9080, J9090, J9091, J9092, J9093, J9094, J9095, J9096, J9097 |
| Temozolomide                       | C1086, C9253, J8700, J9328                                                                |
| <b>Antimicrotubular agents</b>     |                                                                                           |
| Vinorelbine                        | J9390, C9440                                                                              |
| Ixabepilone                        | C9240, J9207                                                                              |
| Eribulin mesylate                  | C9280, J9179                                                                              |
| <b>HER2 agents</b>                 |                                                                                           |
| Trastuzumab (Herceptin)            | J9355, 50242013460, 50242005656, 50242013468                                              |

| Drug Name                                        | HCPCS and NDCs Included                                                                                                                                                                                                                                                                                                                                                                                                                                                                                                                                                                                                                                                                                                                                                                                                                                                                                                                                      |
|--------------------------------------------------|--------------------------------------------------------------------------------------------------------------------------------------------------------------------------------------------------------------------------------------------------------------------------------------------------------------------------------------------------------------------------------------------------------------------------------------------------------------------------------------------------------------------------------------------------------------------------------------------------------------------------------------------------------------------------------------------------------------------------------------------------------------------------------------------------------------------------------------------------------------------------------------------------------------------------------------------------------------|
| Pertuzumab (Perjeta)                             | C9292, J9306, 50242014501                                                                                                                                                                                                                                                                                                                                                                                                                                                                                                                                                                                                                                                                                                                                                                                                                                                                                                                                    |
| Ado-trastuzumab emtansine (Kadcyla)              | J9354, C9131, 50242008801, 50242008701                                                                                                                                                                                                                                                                                                                                                                                                                                                                                                                                                                                                                                                                                                                                                                                                                                                                                                                       |
| Lapatinib                                        | 173075200                                                                                                                                                                                                                                                                                                                                                                                                                                                                                                                                                                                                                                                                                                                                                                                                                                                                                                                                                    |
| <b>Hormonal therapies</b>                        |                                                                                                                                                                                                                                                                                                                                                                                                                                                                                                                                                                                                                                                                                                                                                                                                                                                                                                                                                              |
| Any selective estrogen receptor modulator (SERM) | V07.51                                                                                                                                                                                                                                                                                                                                                                                                                                                                                                                                                                                                                                                                                                                                                                                                                                                                                                                                                       |
| Any aromatase inhibitor (AI)                     | V07.52                                                                                                                                                                                                                                                                                                                                                                                                                                                                                                                                                                                                                                                                                                                                                                                                                                                                                                                                                       |
| Anastrozole (Arimidex)                           | S0170, 51991062010, 54569619800, 378603477, 16729003510, 66336053390, 63275993003, 38779255504, 63275993002, 33261095700, 62033037606, 38779227403, 62756025083, 68001015508, 67877017110, 51079032306, 93753656, 38779227404, 33261095790, 54016413, 68382020906, 51079032301, 60429028690, 62756025013, 66336053330, 51927443500, 33261095730, 378603405, 51655063853, 63275993004, 38779255503, 38779227406, 68084044821, 60505298503, 46144020005, 904622961, 42043018003, 378603493, 60258086603, 42254016130, 16571042103, 42291010530, 63275993001, 16729003516, 33261095760, 60429028630, 68001015504, 55111064730, 68382020910, 54868613001, 54868613000, 51991062033, 76418001301, 21695099030, 67877017130, 904619546, 781535631, 63323012930, 16729003515, 63275993005, 38779255506, 46144020001, 66435041530, 60687011211, 60687011221, 54569573100, 310020137, 54868500000, 310020130, 55175550503, 12280034630, 35356027030                   |
| Exemestane (Aromasin)                            | S0156, 63629126201, 54569573200, 49999098630, 54868526100, 9766304, 60687013221, 54008013, 47781010830, 59762285801, 60687013211                                                                                                                                                                                                                                                                                                                                                                                                                                                                                                                                                                                                                                                                                                                                                                                                                             |
| Fulvestrant (Faslodex)                           | J9395, 310072010, 310072050, 310072025,                                                                                                                                                                                                                                                                                                                                                                                                                                                                                                                                                                                                                                                                                                                                                                                                                                                                                                                      |
| Lapatinib (Tykerb)                               | 173075200                                                                                                                                                                                                                                                                                                                                                                                                                                                                                                                                                                                                                                                                                                                                                                                                                                                                                                                                                    |
| Letrozole (Femara)                               | 35356040930, 78024915, 54868415100, 54569571400, 60505325508, 51991075933, 68258595503, 16729003415, 63323077230, 54026913, 55111064630, 603418016, 60505325503, 53217010830, 62756051183, 378207105, 16729003410, 68084080311, 378207193, 68084080321, 54868625200, 42291037490, 42254024330, 93762056, 51991075910                                                                                                                                                                                                                                                                                                                                                                                                                                                                                                                                                                                                                                         |
| Tamoxifen (Nolvadex, Soltamox, Novoclair, Nuvya) | S0187, 310060412, 57866661501, 55175550006, 403150571, 310060025, 66105083201, 58016065760, 66105083210, 54569038202, 54569853100, 310060018, 55289058530, 60346004832, 310060075, 310060430, 66105083203, 57866661801, 66105083209, 66105083206, 54569038200, 310060060, 310060490, 13632012301, 63370025115, 310073130, 54868300402, 62991115101, 38779034110, 54868300405, 49452757102, 38779034180, 591223319, 38779034103, 49452775301, 54868300401, 52372075602, 63307047005, 49452757104, 591223330, 172565658, 172565746, 38779034101, 172565780, 555090401, 51927297600, 172565760, 93078486, 68258596006, 63370025110, 62991115103, 54483413, 63307047001, 63370025135, 49452775302, 54883125, 172565770, 555044663, 62991115102, 54569860200, 54883425, 52372075601, 54868428703, 75840011001, 38779034104, 93078205, 54483422, 38779034108, 60346090060, 42254034390, 62991115104, 38779034130, 63739026915, 93078410, 54569376500, 49452775305, |

| Drug Name             | HCPCS and NDCs Included                                                                                                                                                                                                                                                                                                                                                                                                                                                                                                                                                                                       |
|-----------------------|---------------------------------------------------------------------------------------------------------------------------------------------------------------------------------------------------------------------------------------------------------------------------------------------------------------------------------------------------------------------------------------------------------------------------------------------------------------------------------------------------------------------------------------------------------------------------------------------------------------|
|                       | 555044609, 172565670, 555090414, 378014491, 591247319, 591247260, 54868428702, 49452757103, 38779034140, 49452775304, 38779034150, 54868428704, 54569376501, 63739026910, 54569585700, 54868428700, 591247330, 555090405, 93078256, 49452757106, 591247218, 310073060, 172565680, 54569571600, 54483121, 38779034105, 93078406, 591223218, 54868300404, 54483126, 49452757105, 555044605, 378027401, 93078405, 63370025125, 54868300403, 54868428701, 378027493, 172565649, 93078201, 51552083802, 555044603, 49452775303, 54868300400, 93078210, 49452757101, 378014405, 591223260, 69167048305, 69167048505 |
| Toremifene (Fareston) | 85112601, 11399000530, 42747032730, 54092017030, 54092017001, 85112602, 11399000501                                                                                                                                                                                                                                                                                                                                                                                                                                                                                                                           |

HCPCS Healthcare Common Procedure Coding System, *HER2* human epidermal growth factor receptor 2, NDC National Drug Code

**Supplementary Table 2** Charlson Comorbidity Index conditions and coding

| Comorbidity                    | ICD-9-CM        | Description                                                     | Index weight |
|--------------------------------|-----------------|-----------------------------------------------------------------|--------------|
| Chronic pulmonary disease      | 490-496         | Chronic obstructive pulmonary disease                           | 1            |
|                                | 500-505         | Pneumoconioses                                                  |              |
|                                | 506.4           | Chronic respiratory condition due to fumes and vapors           |              |
| Diabetes without complications | 250-250.3       | Diabetes with or without acute metabolic disturbances           | 0            |
|                                | 250.7           | Diabetes with peripheral circulatory disorders                  |              |
| Diabetes with complications    | 250.4-250.6     | Diabetes with renal, ophthalmic, or neurological manifestations | 1            |
| Congestive heart failure       | 428-428.9       | Heart failure                                                   | 2            |
| Cerebrovascular disease        | 430-438         | Cerebrovascular disease                                         | 0            |
| Peripheral vascular disease    | 443.9           | PVD                                                             | 0            |
|                                | 441.1-441.9     | Aortic aneurysm                                                 |              |
|                                | 785.4           | Gangrene                                                        |              |
|                                | V43.4           | Blood vessel replaced by prosthesis                             |              |
|                                | Procedure 38.48 | Resection and replacement of lower limb arteries                |              |
| Acute myocardial infarction    | 410-410.9       | Acute MI                                                        | 0            |
| Old myocardial infarction      | 412             | Old MI                                                          | 0            |
| Rheumatologic disease          | 710             | Systemic lupus erythematosus                                    | 1            |
|                                | 710.1           | Systemic sclerosis                                              |              |
|                                | 710.4           | Polymyositis                                                    |              |
|                                | 714.0-714.2     | Adult rheumatoid arthritis                                      |              |
|                                | 714.81          | Rheumatoid lung                                                 |              |

| Comorbidity                   | ICD-9-CM     | Description                                                                | Index weight |
|-------------------------------|--------------|----------------------------------------------------------------------------|--------------|
|                               | 725          | Polymyalgia rheumatica                                                     |              |
| Moderate/severe renal disease | 582.0-582.9  | Chronic glomerulonephritis                                                 | 1            |
|                               | 583.0-583.7  | Nephritis and nephropathy                                                  |              |
|                               | 585          | Chronic renal failure                                                      |              |
|                               | 586          | Renal failure, unspecified                                                 |              |
|                               | 588.0-588.9  | Disorders resulting from impaired renal function                           |              |
| Dementia                      | 290.0-290.9  | Senile and presenile dementias                                             | 2            |
| Ulcer disease                 | 531.0-534.9  | Gastric, duodenal, and gastrojejunal ulcers                                | 0            |
|                               | 531.4-531.7  | Chronic forms of peptic ulcer disease (subsets of above)                   |              |
|                               | 532.4-532.7  |                                                                            |              |
|                               | 533.4-533.7  |                                                                            |              |
|                               | 534.4-534.7  |                                                                            |              |
| Paralysis                     | 344.1        | Paraplegia                                                                 | 2            |
|                               | 342.0-342.9  | Hemiplegia                                                                 |              |
| Mild liver disease            | 571.2        | Alcoholic cirrhosis                                                        | 2            |
|                               | 571.5        | Cirrhosis without mention of alcohol                                       |              |
|                               | 571.6        | Biliary cirrhosis                                                          |              |
|                               | 571.4-571.49 | Chronic hepatitis                                                          |              |
| Moderate/severe liver disease | 572.2-572.8  | Hepatic coma, portal hypertension, other sequelae of chronic liver disease | 4            |
|                               | 456.0-456.21 | Esophageal varices                                                         |              |
| AIDS                          | 042-044.9    | HIV infection with related specified conditions                            | 4            |
| Neuropathy                    | 357.6        | Polyneuropathy due to drugs                                                | NA           |
|                               | 782.0        | Disturbance of skin sensation                                              |              |
|                               | 357          | INFLAM/TOXIC NEUROPATHY                                                    |              |
|                               | 357.0        | Acute infective polyneuritis                                               |              |
|                               | 357.1        | Polyneuropathy in collagen vascular disease                                |              |
|                               | 357.2        | Polyneuropathy in diabetes                                                 |              |
|                               | 357.3        | Polyneuropathy in malignant disease                                        |              |
|                               | 357.4        | Polyneuropathy in other diseases classified elsewhere                      |              |
|                               | 357.5        | Alcoholic polyneuropathy                                                   |              |
|                               | 357.7        | Polyneuropathy due to other toxic agents                                   |              |
|                               | 357.8        | INFLAM/TOX NEUROPATHY NEC                                                  |              |
|                               | 357.81       | Chronic inflammatory demyelinating polyneuritis                            |              |
|                               | 357.82       | Critical illness polyneuropathy                                            |              |
|                               | 357.89       | Other inflammatory and toxic neuropathy                                    |              |
|                               | 357.9        | Unspecified inflammatory and toxic neuropathy                              |              |
|                               | 377.34       | Toxic optic neuropathy                                                     |              |
|                               | 377.2        | OPTIC DISC DISORDERS NEC                                                   |              |
|                               | 377.21       | Drusen of optic disc                                                       |              |

| Comorbidity | ICD-9-CM | Description                                        | Index weight |
|-------------|----------|----------------------------------------------------|--------------|
|             | 377.22   | Crater-like holes of optic disc                    |              |
|             | 377.23   | Coloboma of optic disc                             |              |
|             | 377.24   | Pseudopapilledema                                  |              |
|             | 353.4    | Lumbosacral root lesions, not elsewhere classified |              |
|             | 355.7    | MONONEURITIS LEG NEC                               |              |
|             | 355.71   | Causalgia of lower limb                            |              |
|             | 355.79   | Other mononeuritis of lower limb                   |              |
|             | 355.9    | Mononeuritis of unspecified site                   |              |
|             | 353.0    | Brachial plexus lesions                            |              |

*AIDS* acquired immunodeficiency syndrome, *HCPCS* Healthcare Common Procedure Coding System, *HIV* human immunodeficiency virus, *ICD-9-CM* International Classification of Diseases, Ninth Revision, Clinical Modification, *MI* myocardial infarction, *NDC* National Drug Code, *PVD* peripheral vascular disease.
